# Supplementary material for: Heterologous expression in Saccharopolyspora erythraea of a pentaketide synthase derived from the spinosyn polyketide synthaseElectronic supplementary information (ESI) available: Further details of the construction of pCJR308, the fermentation of BIOT-0966 and the isolation of pentaketide lactone, 3, and figures showing the13C NMR and 1H COSY spectra of 3. See http://www.rsc.org/suppdata/ob/b3/b310740j/
Source: Royal Society of Chemistry journal article supplement (doi:10.1039/b310740j), 2003-01-01
Supplement: b310740j.doc [file b310740j.doc]

# Supplementary data

# Heterologous expression in *Saccharopolyspora erythraea* of a pentaketide synthase derived from the spinosyn polyketide synthase

Christine J. Martin,**a* Máire C. Timoney,*ad* Rose M. Sheridan,*a* Steven G. Kendrew,*a* Barrie Wilkinson*a*, James Staunton*a,c* andPeter F. Leadlay*a,b*

*a*Biotica Technology Ltd, 181A Huntingdon Road, Cambridge, CB3 0DJ, UK. E-mail: Christine.Martin@biotica.co.uk

*b*Cambridge Centre for Molecular Recognition and Department of Biochemistry, University of Cambridge, 80 Tennis Court Road, Cambridge, CB2 1GA, UK.

*c*Cambridge Centre for Molecular Recognition and Department of Chemistry, University of Cambridge, Lensfield Road, Cambridge, CB2 1EW, UK.

*d*Current address: Pfizer Global Pharmaceuticals, Walton Oaks, Dorking Road, Tadworth, KT20 7NS, UK.

#### Construction of pCJR308

An *Nde*I site was introduced to overlap with the start codon of *spnA* by amplification using PCR with pRHB9A6 as the template and the oligonucleotides CR300 and CR301 to give PCR1; (the *Nde*I site is underlined):

CR300 TTCATATGAGCGAAGCCGGGAACCTGATAGCCGT;

CR301 TTCAACAGGGCCTCGACGGCCGCTTCGAACA.

An *Mfe*I site was introduced at the end of spinosyn module 4 as a splice site to introduce the erythromycin thioesterase fragment. This was achieved by amplification using PCR with pRHB3E11 as the template and the oligonucleotides SP01 and SP02 to give PCR2.; the *Mfe*I site is underlined:

SP01 TGCCGGGGCTGAGCACGTGGTGTTGA

SP02 TTTCAATTGGGCGCAGAGGTGACGCGACAGCGACT

The PKS was then assembled in a number of steps with the following fragments being joined together by standard methods in pUC18; numbering is given with 1 bp representing the first base of *spnA*. The *Nde*I(1 bp)/*Bst*BI(2328 bp) PCR1 fragment was joined to a 3123 bp *Bst*BI(2328 bp)/*Blp*I(5450 bp) fragment from cosmid pRHB3E11. A 4947 bp *Blp*I(5450 bp)/*Blp*I(10396 bp) fragment from pRHB3E11 was then added, followed by a 8484 bp *Fse*I(10019 bp)/*Pst*I(18502 bp) fragment from pRHB3E11 to give intermediate plasmid pCJR304. In parallel the *Blp*I(22581 bp)/*Mfe*I(23541 bp) PCR2 fragment was joined to the erythromycin thioesterase on an *Mfe*I/*Xba*I fragment (I. S. Galloway, PhD thesis, University of Cambridge, 1998). A 4080 bp *Pst*I(18502 bp)/*Blp*I(22581 bp) fragment from pRHB3E11 was then added to give intermediate plasmid pCJR306. The 18502 bp *Nde*I/*Pst*I fragment from pCJR304 was then introduced into pCJR306 to give pCJR307, a plasmid that contains the completed truncated polyketide synthase comprising spinosyn modules1-4 and the erythromycin thioesterase. The completed insert was then sub-cloned as an *Nde*I/*Xba*I fragment into pCJR246 to yield pCJR308.

# Fermentation of BIOT-0966

BIOT-0966 was cultured from a -80C frozen stock (cryopreservative 10% lactose, 20% glycerol w/v in water) on R2T206 agar containing thiostrepton (50 mg L-1). A primary pre-culture was inoculated from a well-grown plate into 50 mL TSB medium (tryptic soy broth, 30 g L-1), in 4 x 250 mL Erlenmeyer flasks with a steel spring, shaken at 250 rpm with a two-inch throw at 30°C, for three days. This was used to inoculate (10% v/v) a secondary pre-culture of TSB (300 mL in 2 L Erlenmeyer flasks) which was cultured under the same conditions for a further three days. All seed cultures contained thiostrepton (5 mg L-1). The secondary vegetative pre-culture was used to inoculate (5% v/v) 2 x 12 L SSDM production medium6 (pH 6.3) in a 20 L stirred bioreactor for 5 days at 30°C. SSDM production medium contains per litre deionised water: sucrose, 69 g; KNO3, 10 g; succinic acid, 2.6 g; KH2PO4, 2.7 g; MgSO4.7H2O, 1.2 g; SSDM trace element solution, 10 ml; adjust to pH 6.2 with 1 M KOH. SSDM trace element solution (100X strength) contains per litre deionised water: ZnCl2, 1.000 g; MnCl2.4H2O, 0.620 g; CuCl2.2H2O, 0.053 g; CoCl2, 0.055 g; FeSO4.7H2O, 2.500 g; CaCl2.2H2O, 3.800 g. Airflow was set at 1 vvm and Rushton turbine impeller tip speed was controlled between 0.98 and 1.37 m.s-1. Antifoam, Pluronic L0101 (BASF), was provided on demand.

# Isolation of pentaketide lactone, 3

The clarified fermentation broth (19 L) was extracted three times with an equal volume of ethyl acetate, which, after removal of the solvent, gave 17 g of crude extract. This crude material was subjected to silica flash column chromatography eluting with a gradient from hexane/ethyl acetate (1:1) to ethyl acetate to ethyl acetate/methanol (1:1). Appropriate fractions containing **3** (as determined by LC-MS) were combined and evaporated to dryness yielding 5 g of crude material. This was subjected to C18-silica flash column chromatography. The material was purified in three portions (eluting with a step gradient (10 % change each step) of water through to methanol) and fractions were analysed by LC-MS. Fractions containing **3** were evaporated to yield ~ 2 g of crude material. This was subjected to a further C18-silica flash column. **3** was concentrated in one main fraction (500 mg) as determined by LC-MS, and was further purified (3 x 30 mg samples) by preparative reversed-phase HPLC to yield **3** (20 mg).

13C NMR spectrum of **3**

1H COSY NMR Spectrum of **3**
